# Supplementary material for: The Role of FAS Receptor Methylation in Osteosarcoma Metastasis
Source: MDPI journal article supplement (doi:10.3390/ijms241512155), 2023-07-29
Supplement: s1 [file s1]

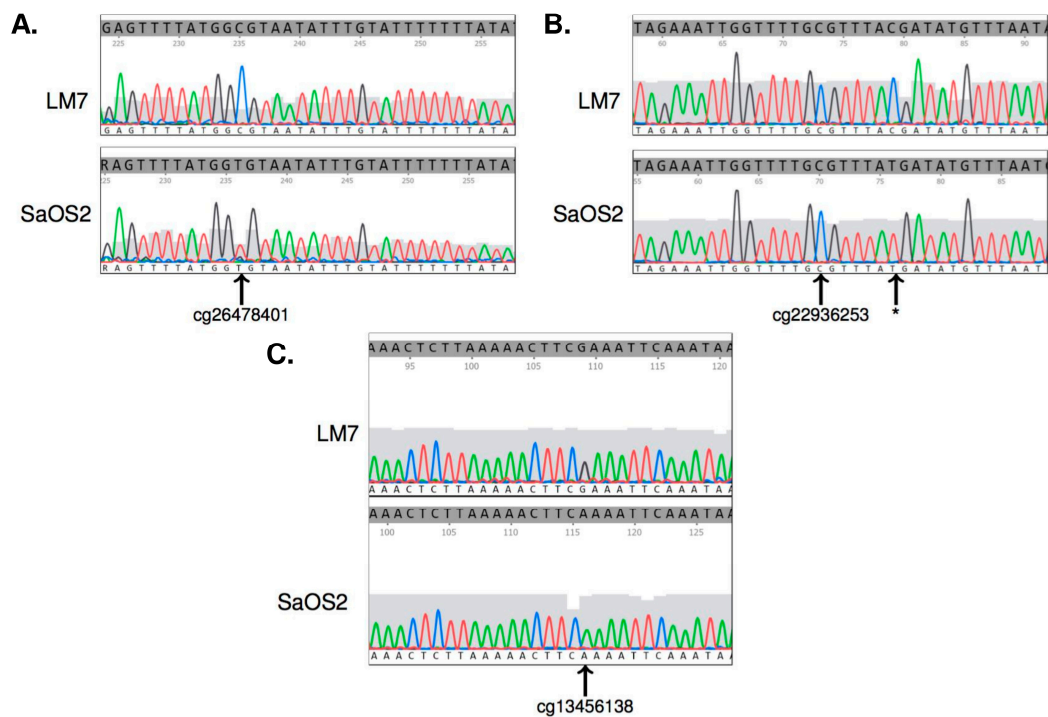

Figure S1: Bisulfite sequencing results from LM7 and SaOS-2 of three HM450 sites. Sequencing results for (a) Site 1, (b) Site 2, and (c) Site 3. \* indicates the additional CpG site near Site 2 not on the HM450 array. A/T (green or red) indicates not methylated while C/G (blue, black) indicates methylated.

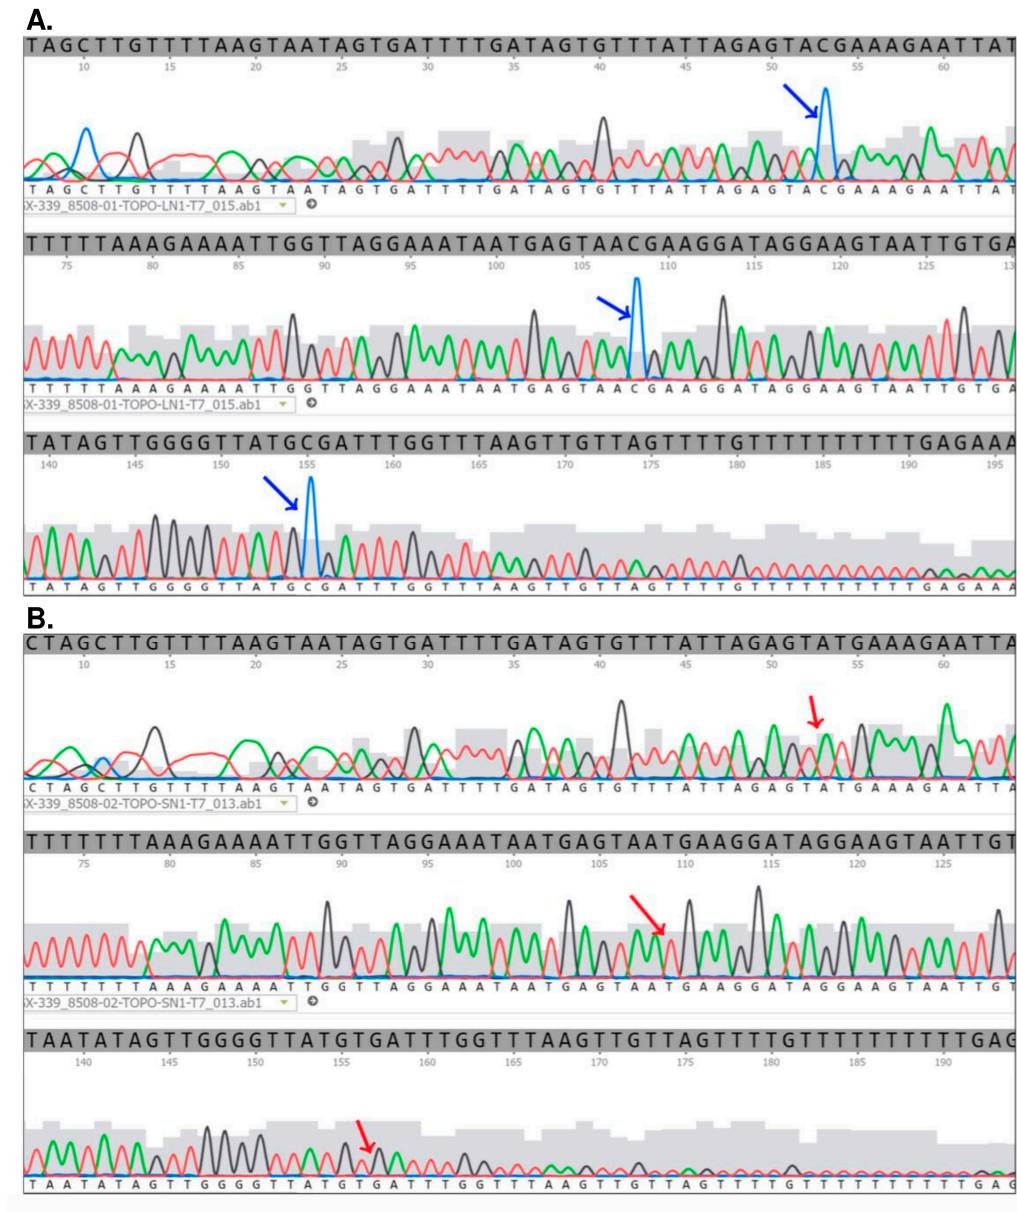

Figure S2: Bisulfite sequencing of three CpG sites upstream of Site 1. Sequencing results of methylation at upstream CpG sites in (a) LM7 and (b) SaOS-2. Consecutive arrows refer to the same sites within LM7 and SaOS2 respectively.

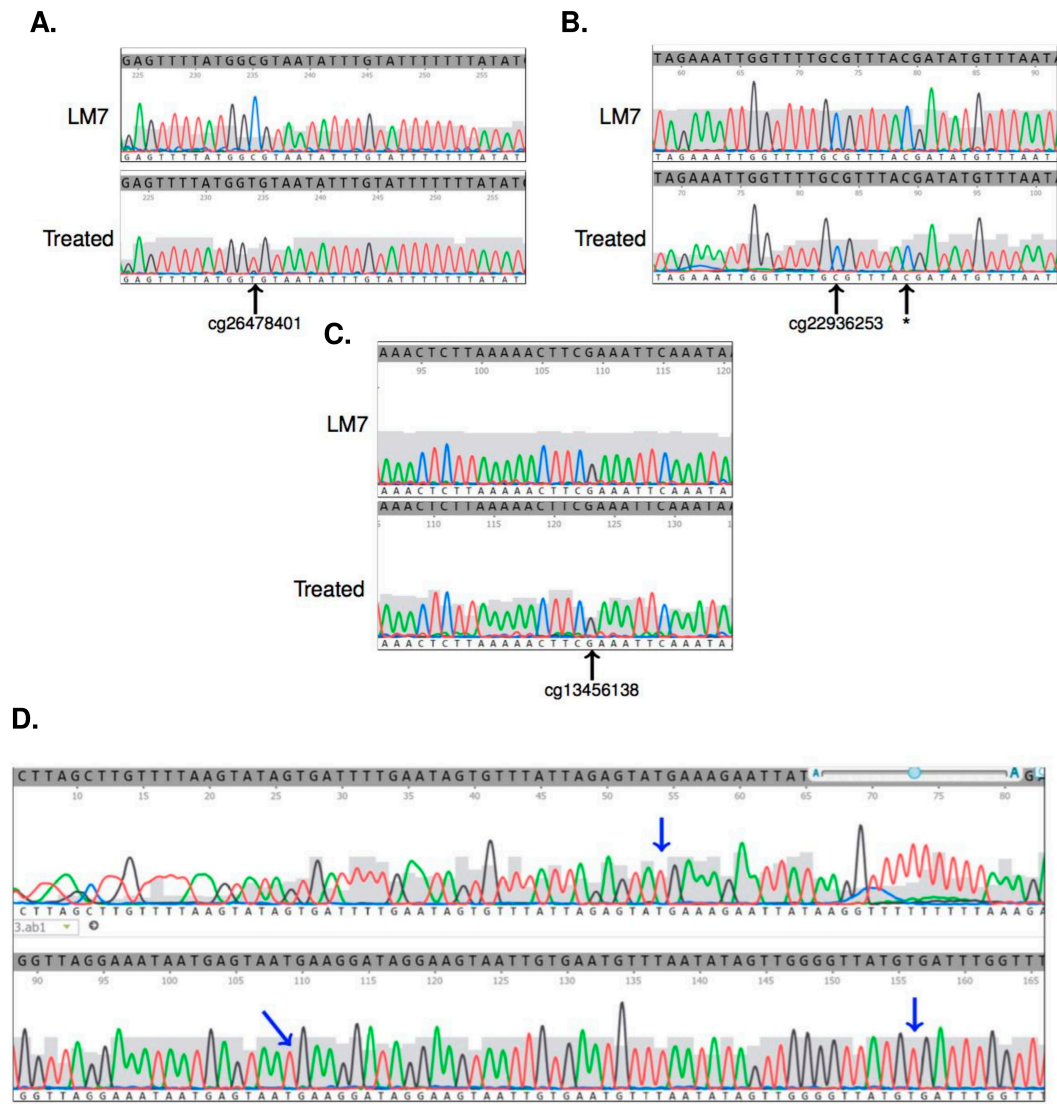

Figure S3: Bisulfite sequencing results after 5-azacytidine treatment. (a) Site 1 is unmethylated after treatment while (b) Site 2 and (c) Site 3 remain methylated. (d) Treated LM7 methylation in three upstream sites from Site are all unmethylated after treatment.

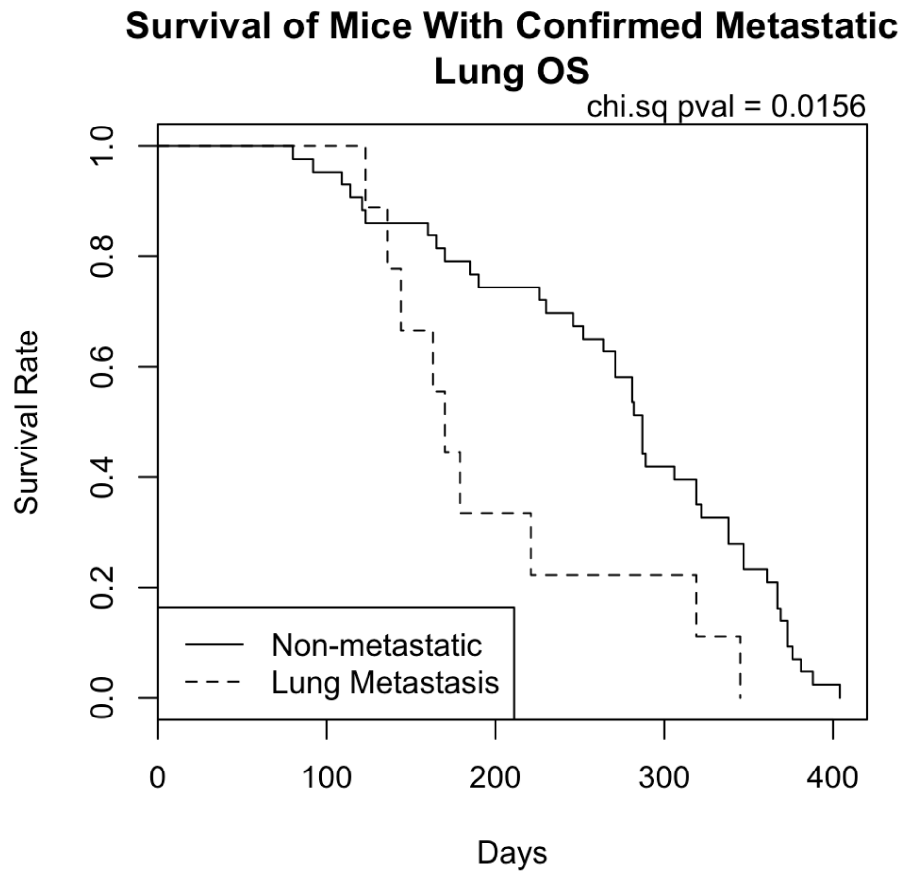

Figure S4: Survival analysis of orthotopically injected mice. Kaplan-Meier curves comparing survival of mice that developed lung metastasis versus mice that did not develop metastasis. Significant differences in survival calculated using a Wald test.

Table S1: Summary of methylation probes in FAS promoter and first intron

| TargetID   | Mean  | S.D. <sup>a</sup> | Rho <sup>b</sup> | p-value | Adj. p-value <sup>c</sup> |
|------------|-------|-------------------|------------------|---------|---------------------------|
| cg26478401 | 0.417 | 0.236             | -0.511           | 0.000   | 0.000                     |
| cg15774510 | 0.019 | 0.015             | -0.145           | 0.181   | 0.342                     |
| cg16257983 | 0.032 | 0.035             | -0.281           | 0.009   | 0.031                     |
| cg17120764 | 0.020 | 0.014             | -0.281           | 0.009   | 0.031                     |
| cg14538439 | 0.023 | 0.005             | -0.061           | 0.577   | 0.701                     |
| cg26461637 | 0.013 | 0.003             | -0.123           | 0.258   | 0.417                     |

|            |       |       |        |       |       |
|------------|-------|-------|--------|-------|-------|
| cg03387256 | 0.020 | 0.004 | -0.338 | 0.002 | 0.009 |
| cg21565150 | 0.024 | 0.007 | -0.041 | 0.708 | 0.802 |
| cg24417391 | 0.038 | 0.006 | -0.202 | 0.062 | 0.152 |
| cg27008694 | 0.014 | 0.003 | -0.032 | 0.770 | 0.818 |
| cg05358439 | 0.027 | 0.007 | 0.001  | 0.990 | 0.990 |
| cg03158499 | 0.051 | 0.013 | 0.114  | 0.294 | 0.417 |
| cg19573567 | 0.059 | 0.015 | 0.168  | 0.122 | 0.258 |
| cg03520966 | 0.216 | 0.037 | 0.114  | 0.293 | 0.417 |
| cg13632959 | 0.034 | 0.014 | 0.100  | 0.360 | 0.471 |
| cg22936253 | 0.726 | 0.142 | -0.597 | 0.000 | 0.000 |
| cg03273183 | 0.954 | 0.052 | 0.234  | 0.031 | 0.087 |

<sup>a</sup> Standard deviation

<sup>b</sup> Rho calculated from spearman correlation

<sup>c</sup> Adjusted p-value calculated using Benjamini-Hochberg multiple testing correction
